# Supplementary material for: Redefining Remission Induction Chemotherapy Ineligibility by Early Mortality in De Novo Acute Myeloid Leukemia
Source: MDPI journal article supplement (doi:10.3390/jcm10245768), 2021-12-09
Supplement: s1 [file s1]

Supplemental Table S1. Clinical characteristic of the patient using prophylactic fluoroquinolone

| Age | Gender | LDH | ECOG PS | Dose                                                   | Survival days | Cause of death            |
|-----|--------|-----|---------|--------------------------------------------------------|---------------|---------------------------|
| 53  | Male   | 271 | 0       | Daily levofloxacin (500mg) for 5 days during the nadir | 313           | Graft versus host disease |

LDH: lactate dehydrogenase; ECOG: Eastern Cooperative Oncology Group; PS: performance status
